# Supplementary material for: Absorptive supramolecular elastomer wound dressing based on polydimethylsiloxane–(polyethylene glycol)–polydimethylsiloxane copolymer: preparation and characterization
Source: Royal Society of Chemistry journal article supplement (doi:10.1039/c6ra07146e), 2016-01-01
Supplement: c6ra07146e1.pdf [file c6ra07146e1.pdf]

Electronic Supporting Information (ESI) for

**Absorptive supramolecular elastomer wound dressing based on  
polydimethylsiloxane-(polyethylene glycol)-polydimethylsiloxane  
copolymer: Preparation and characterization**

Wenwen Deng, <sup>a</sup> Yufeng Lei, <sup>a</sup> Shengwen Zhou, <sup>a</sup> Anqiang Zhang, <sup>a,\*</sup> Yaling Lin <sup>b,\*</sup>

*a.* College of Material Science and Engineering, South China University of Technology, 381 Wushan Rd.,  
Guangzhou 510641, Guangdong, China.

*b.* College of Materials and Energy, South China Agriculture University, 483 Wushan Rd., Guangzhou 510642,  
Guangdong, China.

**Part S1. Charaterization of ESESi**

**Part S2. Bacterial permeation experiments**

**Part S3. Over-all view of the H&E stained wound tissues**

## Part S1. Charaterization of ESESi

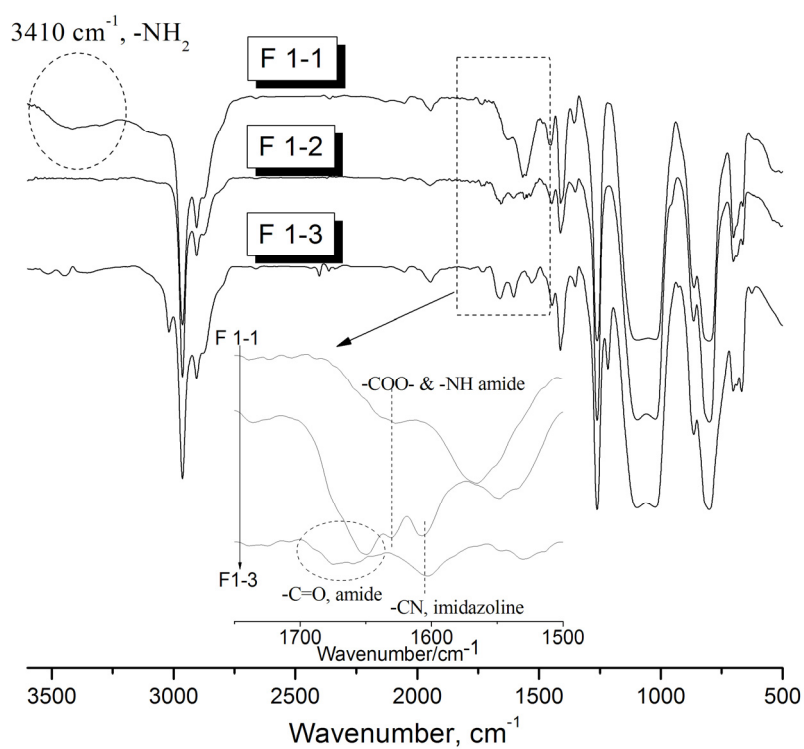

**Figure S1.** FT-IR spectra of samples collected during in the Stage 1 reaction to prepare ESESi: F 1-1: mixture of PDMS- $\text{COOH}_2$  and DETA before starting to heat, F 1-2: sample was collected when temperature reached  $135 \text{ }^\circ\text{C}$ , F 1-3: sample was collected after stopping reaction

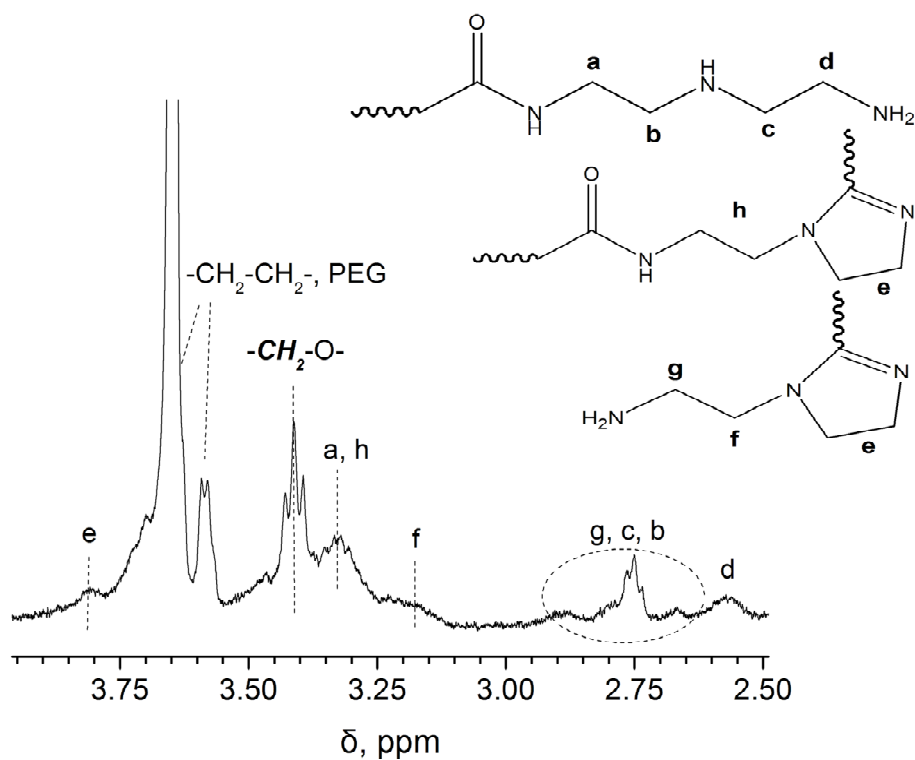

**Figure S2.**  $^1\text{H-NMR}$  spectra of the product of the Stage 1.

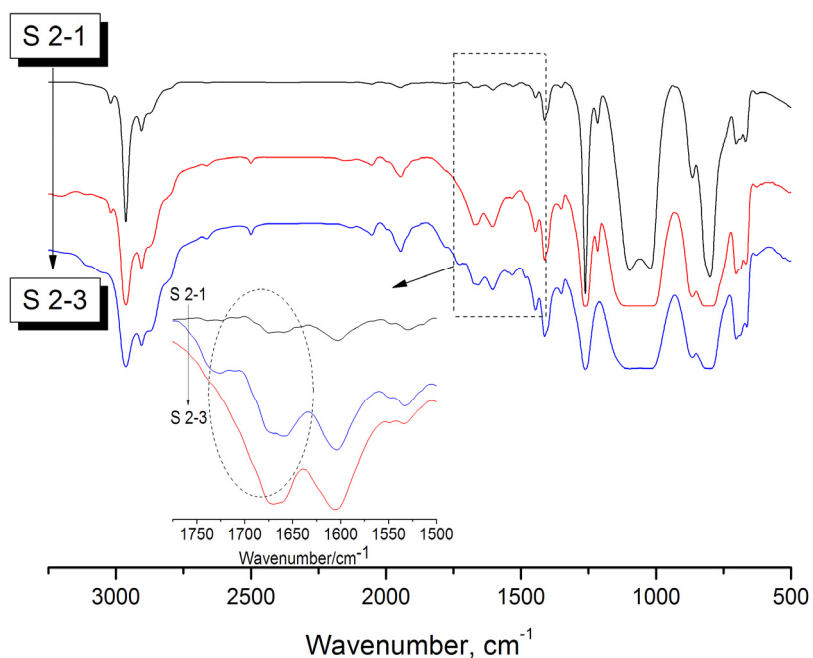

**Figure S3.** FT-IR spectra of samples collected during in the Stage 2 to prepare ESESi: S 2-1: mixture of reactants; S 2-2: sample was collected after temperature reached 135°C; F S-3: sample was collected when the reaction was ended.

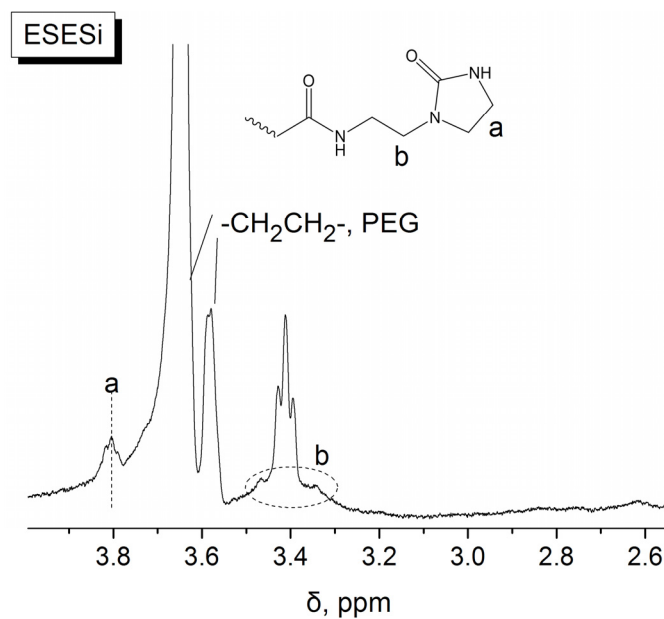

**Figure S4.** <sup>1</sup>H-NMR spectra of ESESi.

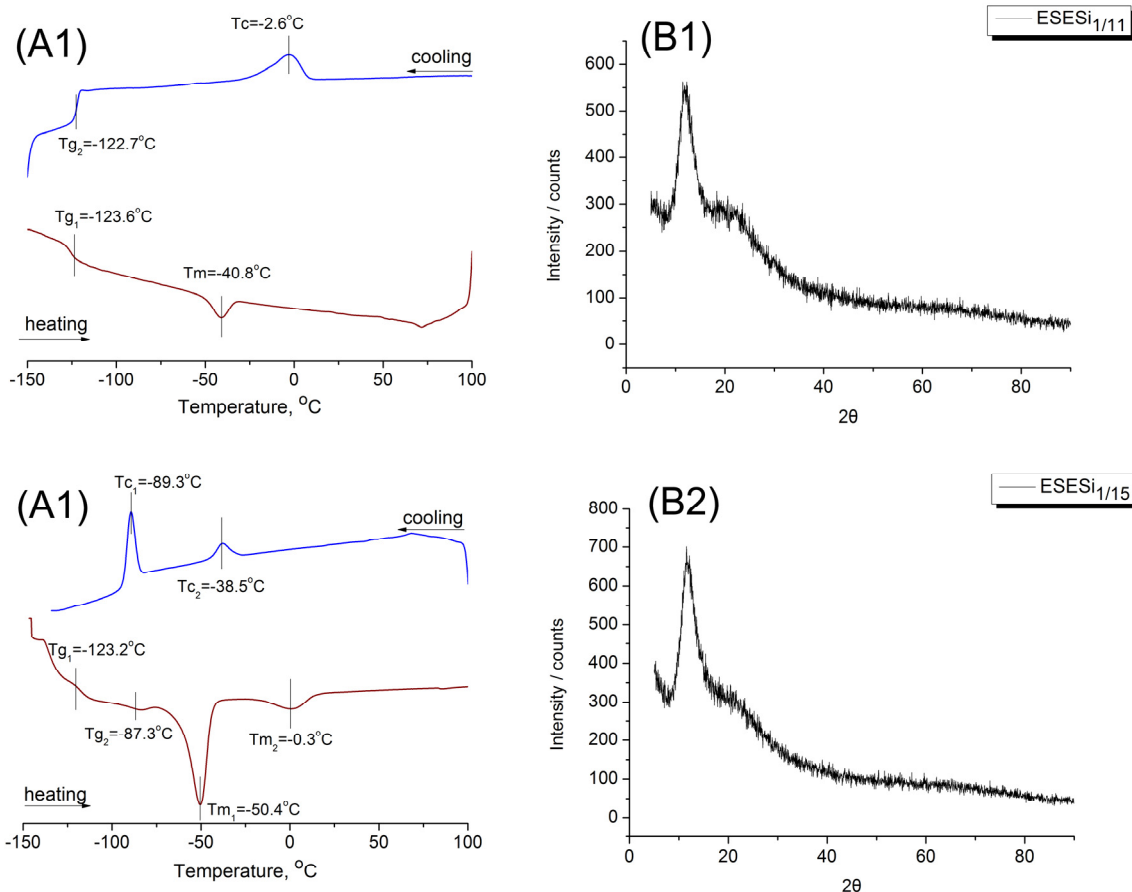

**Figure S5.** Typical curves of (A) DSC and (B) XRD curves of ESESi<sub>1/11</sub> and ESESi<sub>1/15</sub>.

## Part S2. Bacterial permeation experiments

The membranes were sterilized by irradiation with 75% ethanol and then ultraviolet light for 30 min. *E. coli* and *S. cremoris* were cultured aerobically at 37 °C and shaken at 150 rpm for 12-16 h. Sterilized samples of the ESESi film, the SESi film, the Tegaderm™ film and the vaseline gauze were cut into circular discs (diameter 10 mm) and placed on the center of an agar dish. Next, the bacterial suspensions were diluted to  $1 \times 10^9$  colony-forming units (CFU)/mL, 20 mL of these suspensions were added to the center of each sample, and the inoculum was uniformly plated on the surface of each sample. After incubation at 37 °C for 24 h, the agar under each sample was cut with a knife and placed into a tube containing 2 mL of PBS. The bacteria on the agar were detached for 4 min using an ultrasonic cleaner, and the numbers of bacteria were determined by routine CFU analysis on an agar dish with different dilutions.

As shown in **Figure S6**, the vaseline gauze cannot protect against *E. coli* or *S. cremoris* permeation. In contrast, ESESi films completely prevent bacterial invasion, as do the controls (SESi film and Tegaderm™ film).

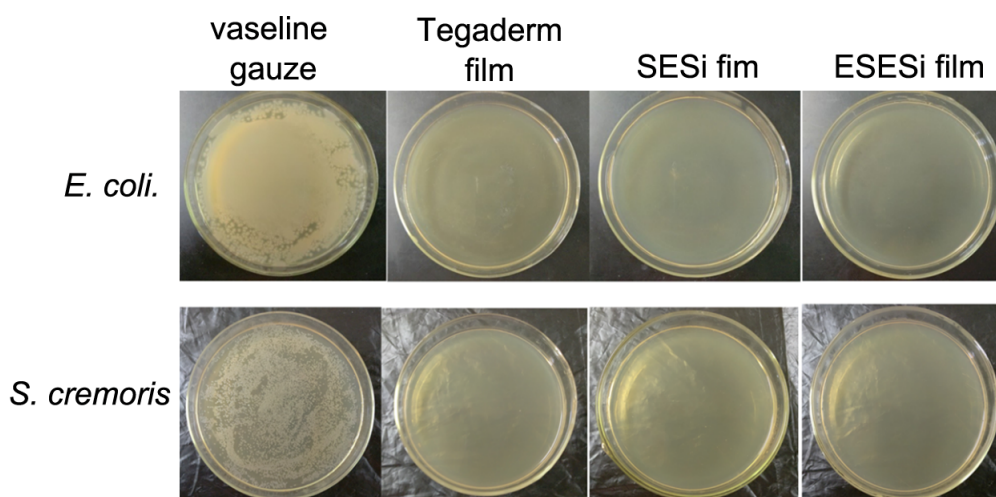

**Figure S6.** The photos of bacterial permeation experiments.

**Part S3. Over-all view of the H&E stained wound tissues**

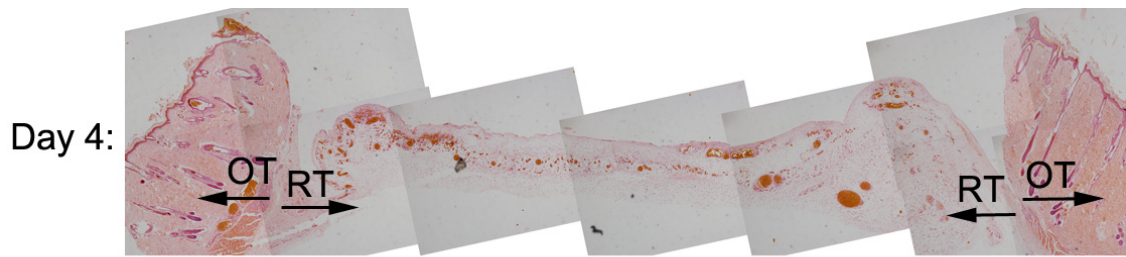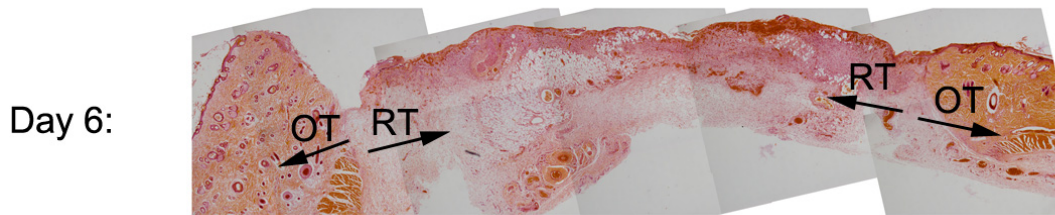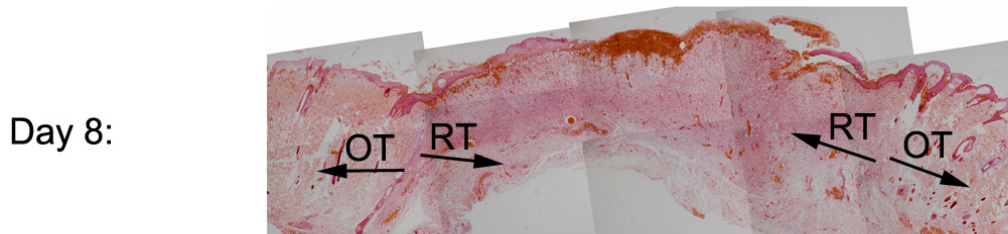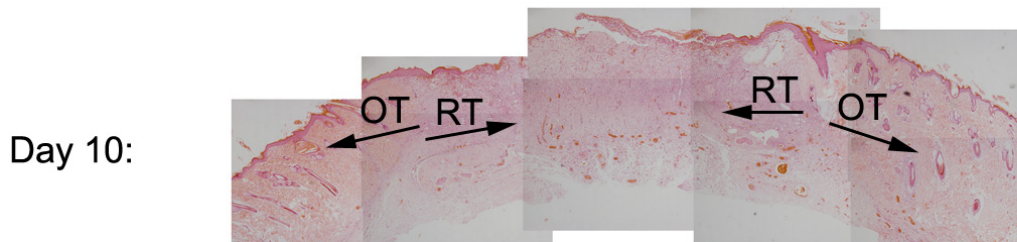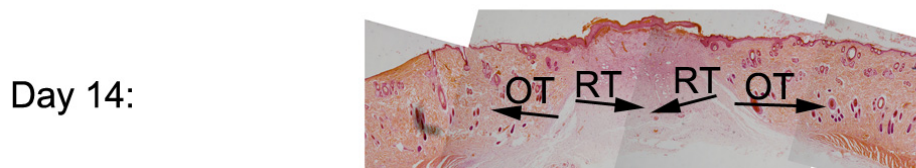

(A) Vaseline gauze

Day 4:

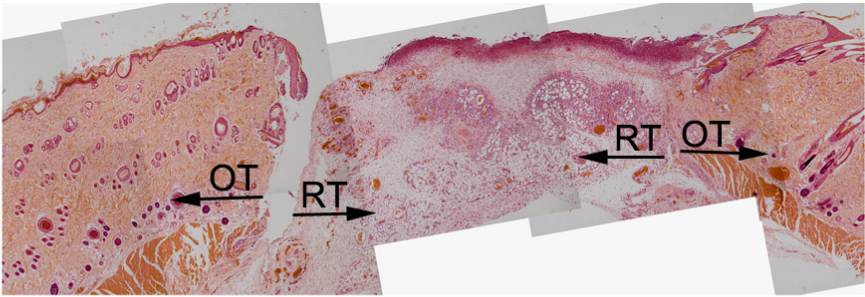

Day 6:

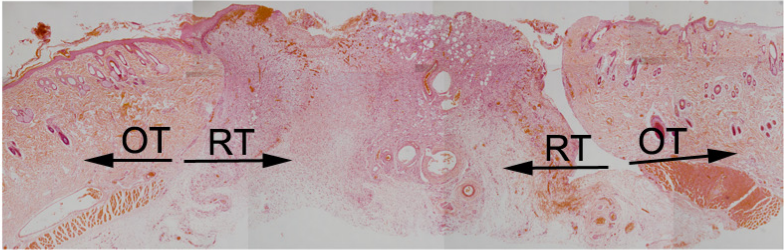

Day 8:

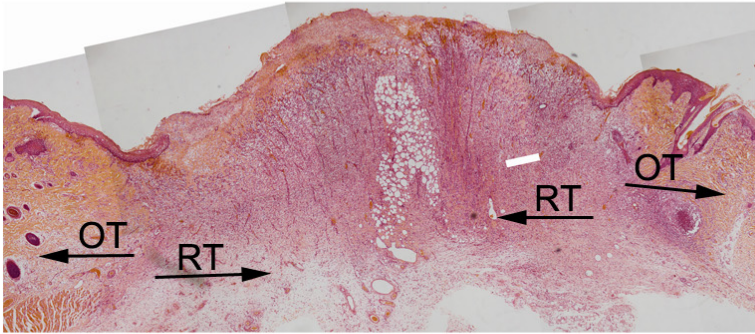

Day 10:

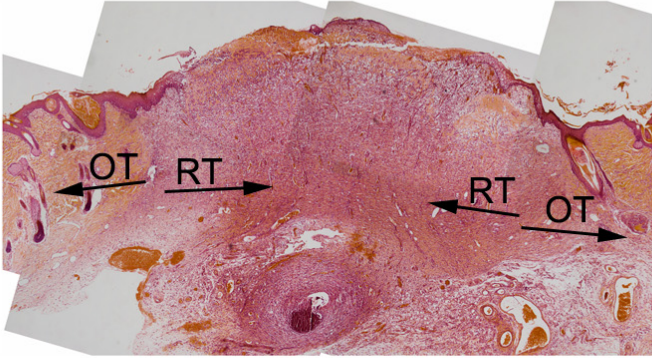

Day 14:

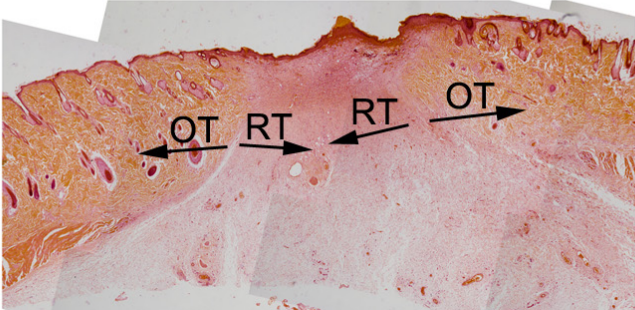

(B) 3M Tegaderm™ film

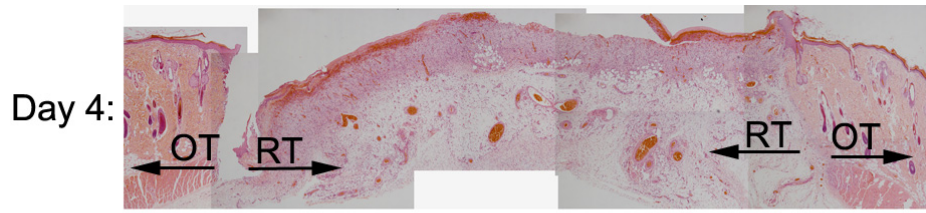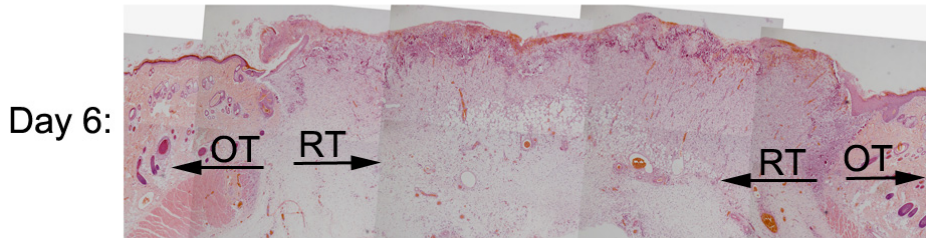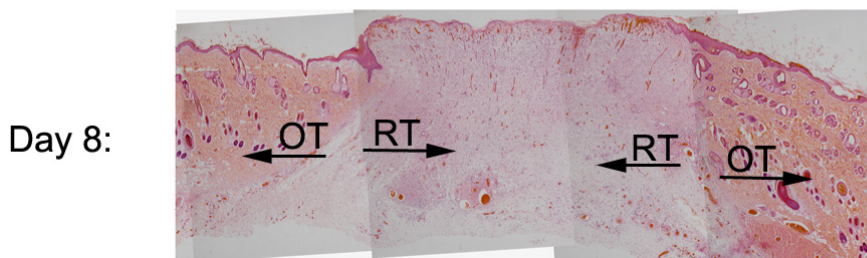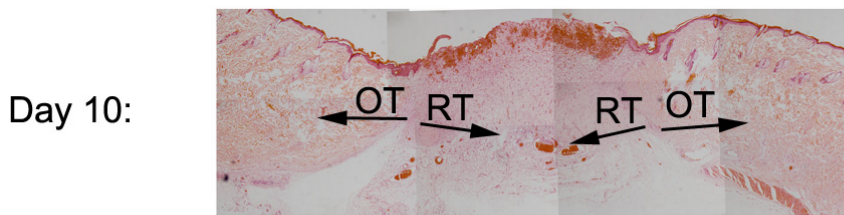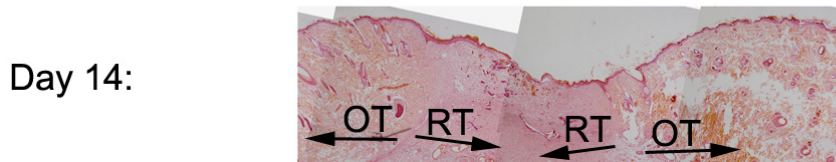

(C) SESi film



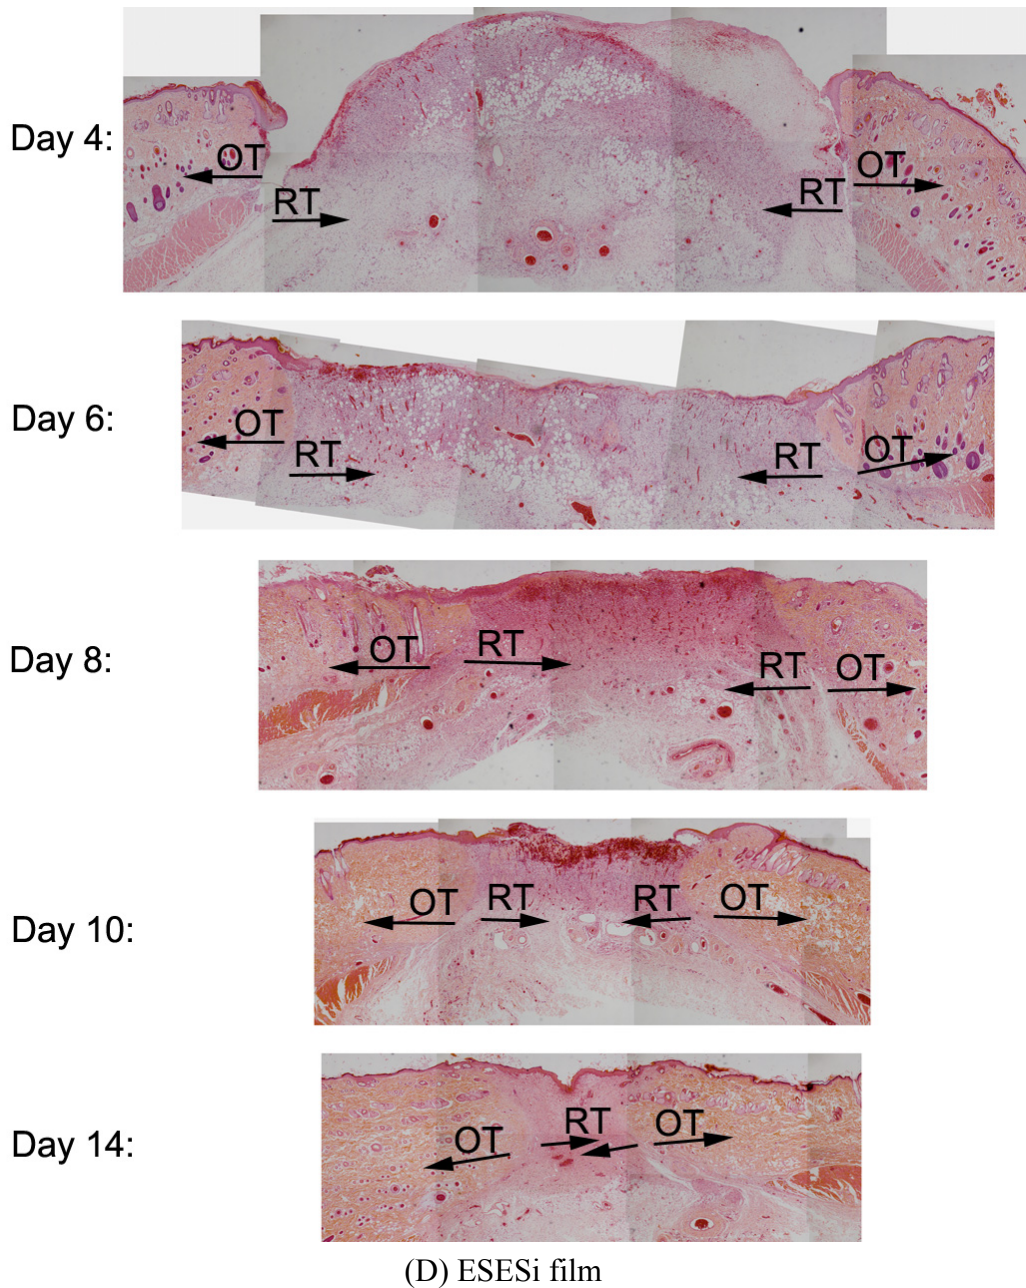

**Figure S7.** Over-all view of the H&E stained wound tissues (40×): (A): Vaseline gauze; (B) Tegaderm film; (C) SESi film and (D) ESESi film.  
 (OT: original tissue; RT: recovered tissue)
